# Supplementary material
Source: PubMed Central journal article supplement (PMC3220484)
Supplement: supp_M111.274290_jbc.M111.274290-1.pdf [file supp_M111.274290_jbc.M111.274290-1.pdf]

Supplemental Table 1. Primer sequences used for generating POP2 mutants (mutated nucleotides are underlined).

| POP2 Mutants      | Sequences                                                              |
|-------------------|------------------------------------------------------------------------|
| POP2 $\alpha$ 1   | forward: 5'- CTGGAGCAGCTCAGCT <u>AGG</u> ATGAGTTGAGCAAG -3'            |
|                   | reverse: 5'- CTTGCTCAACTCATCCTAGCTGAGCTGCTCCAG -3'                     |
| POP2 $\alpha$ 1-3 | forward: 5'- CAGAGGTAGACAAGGCTAAT <u>TAGA</u> AGCAACTGGTAGAAATCTTC -3' |
|                   | reverse: 5'- GAAGATTTCTACCAGTTGCTTCTAATTAGCCTTGTCTACCTCTG -3'          |
| POP2 $\alpha$ 1-4 | forward: 5'- CCAGCCACTCCTGCT <u>GAT</u> ACTGGGCAGGGATG -3'             |
|                   | reverse: 5'- CATCCCTGCCAGTATCAGCAGGAGTGGCTGG -3'                       |
| POP2 $\alpha$ 1-5 | forward: 5'- GTCTTTGAAAAGATGAAT <u>TAA</u> ACGCATCTGTCTGGGAGAG -3'     |
|                   | reverse: 5'- CTCTCCAGACAGATGCGTTTAATTCATCTTTTCAAAGAC -3'               |
| POP2 A2V          | forward: 5'- GAATTCCCGCGGATGGTATCTTCTGCAGAGCTG -3'                     |
|                   | reverse: 5'- CAGCTCTGCAGAAGATACCATCCGCGGGAATTC -3'                     |
| POP2 E6Q          | forward: 5'- GGCATCTTCTGCAC <u>AG</u> CTGGACTTCAACCTG -3'              |
|                   | reverse: 5'- CAGGTTGAAGTCCAGCTGTGCAGAAGATGCC -3'                       |
| POP2 L7M          | forward: 5'- GCATCTTCTGCAGAGATGGACTTCAACCTGCAG -3'                     |
|                   | reverse: 5'- CTGCAGGTTGAAGTCCATCTCTGCAGAAGATGC -3'                     |
| POP2 D8G          | forward: 5'- CTTCTGCAGAGCTGGGCTTCAACCTGCAGGCTC -3'                     |
|                   | reverse: 5'- GAGCCTGCAGGTTGAAGCCAGCTCTGCAGAAG -3'                      |
| POP2 E16A         | forward: 5'- CTGCAGGCTCTTCTGG <u>CG</u> CAGCTCAGCCAGGATG -3'           |
|                   | reverse: 5'- CATCCTGGCTGAGCTGCGCCAGAAGAGCCTGCAG -3'                    |
| POP2 QMG          | forward: 5'- GGCATCTTCTGCAC <u>AG</u> ATGGGCTTCAACCTGCAGGCTC -3'       |
|                   | reverse: 5'- GAGCCTGCAGGTTGAAGCCATCTGTGCAGAAGATGCC -3'                 |

POP2  $\Delta\alpha$ 1:BamH1 after M1: (forward: 5'-GAA TTC CCG CGG ATG gga tcc TCT GCA GAG CTG GAC -3')  
(reverse: 5'- GTC CAG CTC TGC AGA GGA TCC CAT CCG CGG GAA TTC -3')MabmH1 after E16: (forward: 5'-CAG GCT CTT CTG GAG gga tcc AGC CAG GAT GAG TTG -3')  
(reverse: 5'- CAA CTC ATC CTG GCT GGA TCC CTC CAG AAG AGC CTG -3')
